# Supplementary material
Source: PubMed Central journal article supplement (PMC6506718)

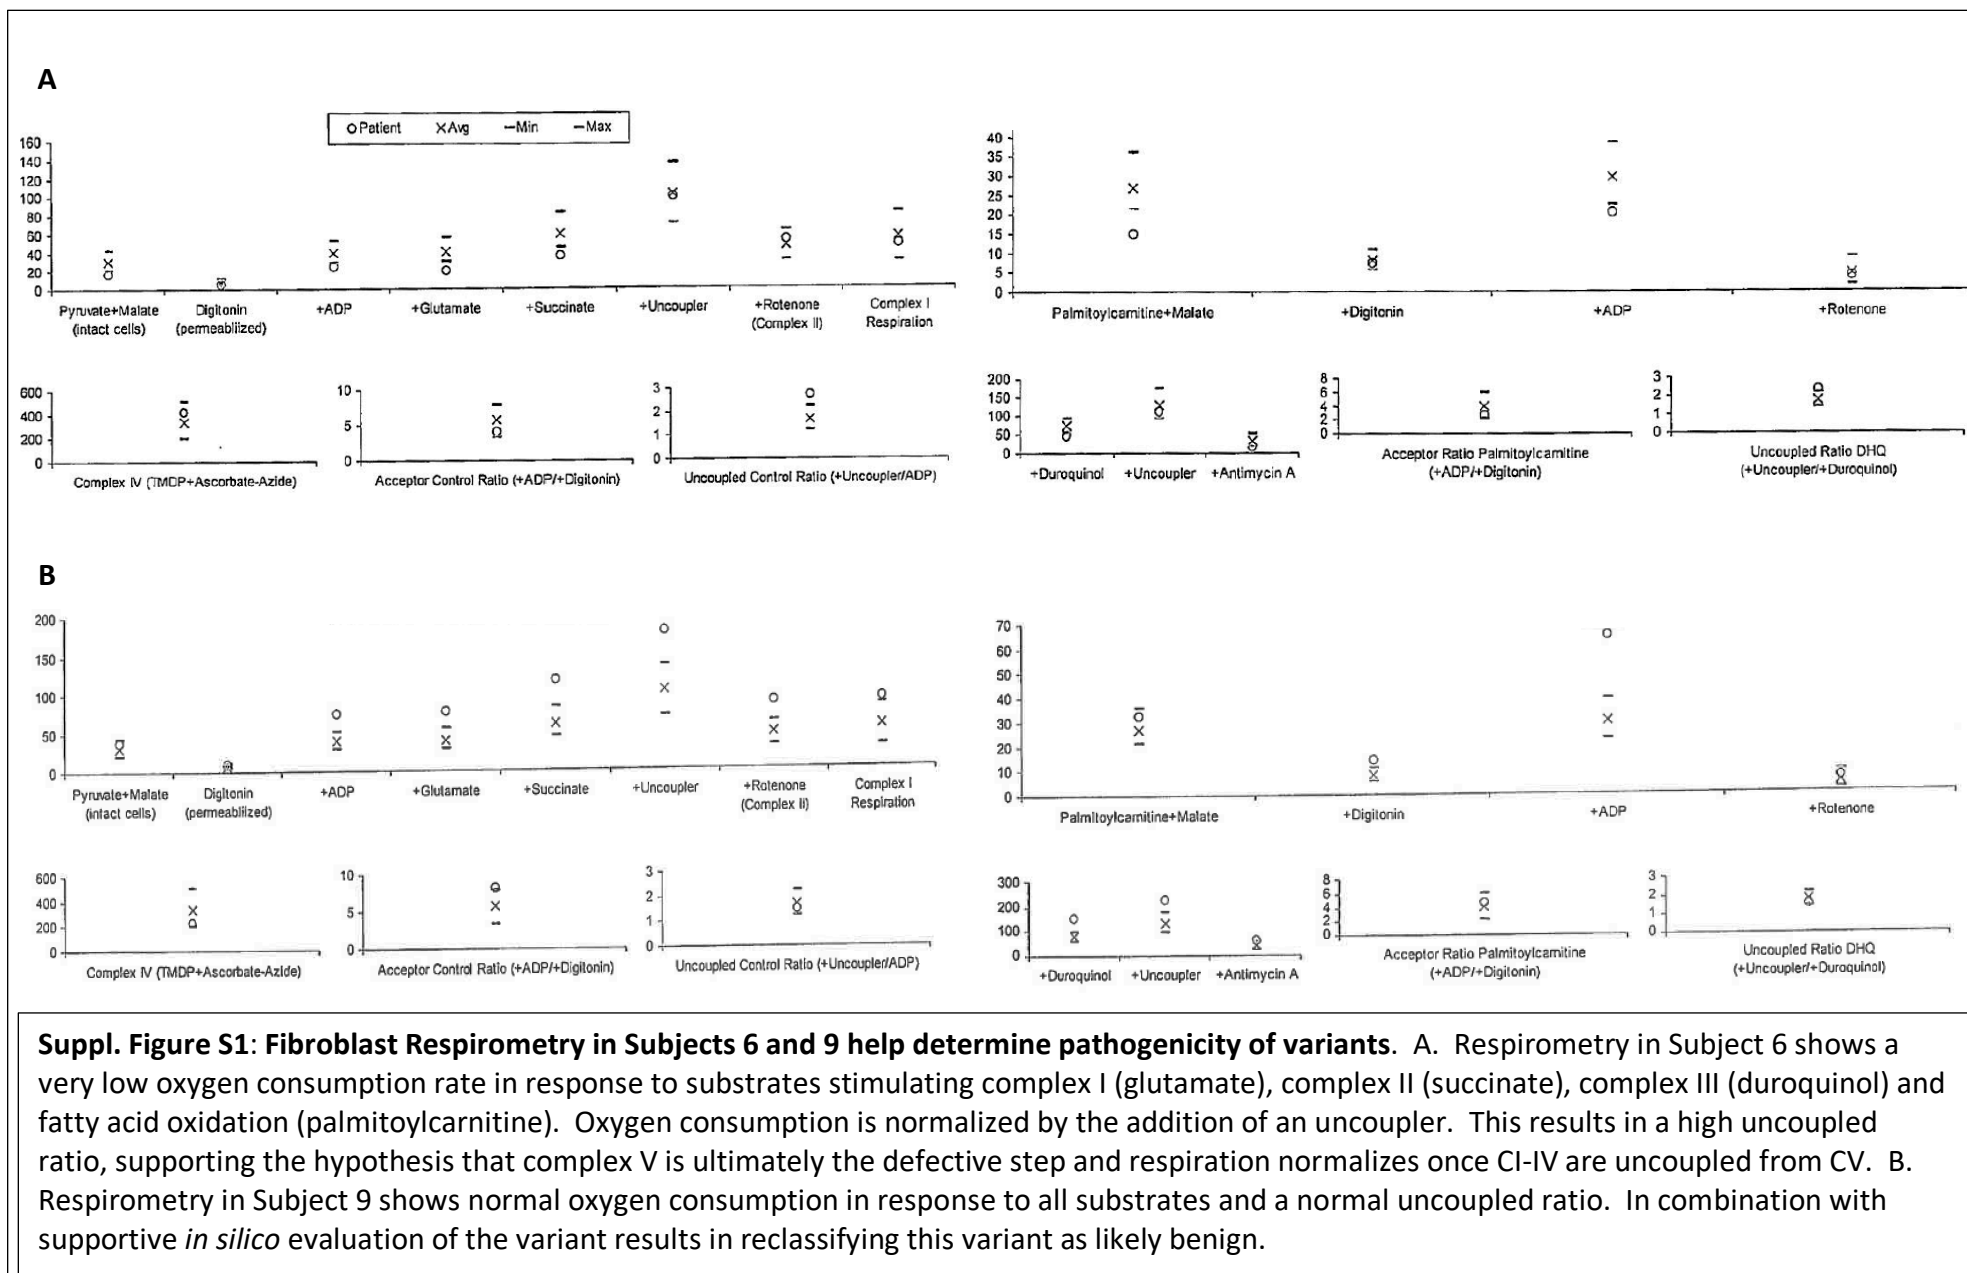

Supplement: NIHMS1012252-supplement-supp_info.pdf [file NIHMS1012252-supplement-supp_info.pdf]
